# Supplementary material for: Plasma proteome and incident myocardial infarction: sex-specific differences
Source: PubMed Central journal article supplement (PMC11560279; doi:10.1093/eurheartj/ehae658), 2024-10-14

# Supplementary Material

## Plasma proteome and incident myocardial infarction: sex-specific differences

Olga E. Titova, Shuai Yuan, Liisa Byberg, John A. Baron, Lars Lind, Karl Michaëlsson and Susanna C. Larsson

| <i>Content</i>                                                                                                                                                                     | <i>Page</i> |
|------------------------------------------------------------------------------------------------------------------------------------------------------------------------------------|-------------|
| <b>Supplementary information.</b> Methods                                                                                                                                          | 2-4         |
| <b>Supplementary Table 1.</b> Proteins included in the CVD II, CVD III and Metabolism assay Olink panels in SIMPLER cohorts                                                        | 5-10        |
| <b>Supplementary Table 2.</b> Proteins in the CVD II, CVD III and Metabolism panels excluded from the analysis based on SIMPLER (more than 50% of samples were below LOD)          | 11          |
| <b>Supplementary Table 3.</b> Details of the single nucleotide polymorphisms used as instrumental variables in the Mendelian randomization analysis                                | 12-14       |
| <b>Supplementary Table 4.</b> Baseline characteristics of SIMPLER participants by the incident myocardial infarction (MI) status during follow-up                                  | 15          |
| <b>Supplementary Table 5.</b> Baseline characteristics of the study participants in the replication cohort <b>UK Biobank</b>                                                       | 16          |
| <b>Supplementary Table 6.</b> Associations between replicated proteins and incident myocardial infarction in the entire <b>SIMPLER cohort</b> in fully adjusted analyses, n=11,751 | 17-18       |
| <b>Supplementary Table 7.</b> Associations between replicated proteins and incident myocardial infarction in the <b>UK Biobank cohort</b> in fully adjusted analyses, n=51,613     | 19-20       |
| <b>Supplementary Table 8.</b> Associations between circulating proteins and incident myocardial infarction in <b>women</b> in the SIMPLER cohort and the UK Biobank cohort         | 21-22       |
| <b>Supplementary Table 9.</b> Associations between circulating proteins and incident myocardial infarction in <b>men</b> in the SIMPLER cohort and the UK Biobank cohort           | 23-24       |
| <b>Supplementary Table 10.</b> Results of Mendelian randomization analysis for identified protein-related SNPs and the risk of myocardial infarction                               | 25-28       |
| <b>Supplementary Table 11.</b> Associations between 45 proteins identified in the primary analysis and overall mortality in SIMPLER in fully adjusted analyses (n = 12,314)        | 29-30       |
| <b>Supplementary Table 12.</b> Druggability of proteins associated with MI in Mendelian randomization analysis                                                                     | 31-32       |
| <b>Supplementary Figure 1.</b> Flow chart and study design based on SIMPLER and UK Biobank cohorts and Mendelian randomization analysis.                                           | 33          |
| <b>Supplementary Figure 2.</b> Correlation between 45 replicated circulating proteins associated with incident myocardial infarction in the analysis based on SIMPLER.             | 34          |

# Supplementary Material

## Supplementary information. Methods

### 1. SIMPLER (discovery sample)

#### 1.1. Cohort description

Participants included in SIMPLER subcohorts (referred to here as the *Uppsala cohort* and *Västmanland cohort*) were randomly selected from the two larger population-based longitudinal SIMPLER cohorts, the Swedish Mammography Cohort (SMC) and the Cohort of Swedish Men (COSM), which were designed to explore the link between lifestyle, dietary exposures, and disease outcomes. Briefly, the SMC was established between 1987 and 1990, when all women living in Västmanland and Uppsala counties and born between 1914 and 1948 received a questionnaire on dietary habits and other characteristics (90,303 women invited, 74% response rate). The COSM was established in 1997 and included men living in Västmanland and Örebro counties, born between 1918 and 1952 (100,303 men invited, 49% response rate). In 1997, the 56,030 participants in SMC who were still alive and resided in the study area received an expanded diet and lifestyle questionnaire similar to one sent to COSM participants (70% response rate).<sup>1</sup> In 2008, a new *Health questionnaire* was sent to the participants in SMC and COSM who were alive (response rate: 63% in SMC and 78% in COSM). In 2009, SMC and COSM participants who completed the health questionnaire in 2008 received an updated *Diet and lifestyle questionnaire* (response rate: 84% in SMC and 90% in COSM).<sup>2</sup> The questionnaires were identical besides specific questions relevant for women or men (e.g., related to the age of menopause or problems with urination). According to previous research based on these cohorts, SMC and COSM are representative of the Swedish population in terms of age distribution, educational level, and prevalence of overweight and obesity.<sup>3</sup>

Between November 2003 and October 2009, the 5022 women who were randomly chosen for the subcohort named *Uppsala cohort* underwent a clinical examination that included dual-energy X-ray absorptiometry (DXA) measurements, blood and urine samples, fat biopsies, and anthropometric assessment. In 2010–2019, women and men living in Västmanland County who participated earlier in SMC or COSM were invited to take part in a clinical investigation similar to the one described for the Uppsala cohort (referred to as the *Västmanland cohort*). The questionnaire filled out close to the clinical examination as well as other measurements were similar. The harmonization of the questionnaire-based data and clinical or biochemical parameters was done prior to the imputation of missing values.

## Proteomic analysis

## Supplementary Material

Venous blood samples were collected after a 12-hour overnight fast, and the samples were immediately centrifuged and stored at  $-80^{\circ}\text{C}$  until analysis. The analyses were performed at SciLifeLab, Uppsala University, Sweden. Inter-plate variability was adjusted for by intensity normalization with the plate median as the normalization factor. For data analysis Olink NPX Manager Software was used. In addition, *bridge sample normalization* using 100 bridging samples was applied by Olink Bioscience to reduce any technical variation in the results of two cohorts ([www.olink.com](http://www.olink.com)).

N-terminal prohormone brain natriuretic peptide (NT-proBNP) was measured in both the CVD III and Metabolism panels. The latter was used for the analyses since more values passed the internal quality controls there.

### 1.2. Assessment of covariates

Physical activity was reported as walking or bicycling and leisure time exercise. The physical activity questionnaire has been validated using 7-day activity records and accelerometer data.<sup>4</sup> Potential confounders were selected using directed acyclic graphs<sup>5</sup> based on our *a priori* knowledge of the relationships among potential confounders, intermediate variables, exposure, and outcome variables, as well as on existing information regarding factors associated with risk of MI and circulating proteins. Plasma glucose, LDL- and HDL-cholesterol levels were measured with standard analytical methods.

## 2. UK Biobank (replication sample)

### 2.1. Proteomic analysis

Plasma levels of 2,923 proteins were measured by the Olink proteomics assay Explore (OLINK, Uppsala, Sweden) using the proximity extension assay technique. An extensive quality control was conducted, and according to the information from the manufacturer, the observed mean intra-assay and inter-assay coefficients of variation were in the 8-17% range. The proteomic analyses in UK Biobank have been previously described.<sup>6</sup> Data on proteins METRNL and MMP-2 was not available in the UK Biobank sample used for the replication analyses. Abbreviations and names for some proteins differed between SIMPLER and UK Biobank samples. For simplicity, the same abbreviations and names given for SIMPLER cohorts were used in all results presented based on SIMPLER and UK Biobank.

# Supplementary Material

## 2.2. Assessment of covariates

Serum glucose, LDL- and HDL-cholesterol concentrations were assessed by a Beckman coulter AU5800, by standard methods. Blood pressure was measured twice in the sitting position with an automated Omron device. Ethnicity was categorized into four groups: White, Black, Asian, and other. Townsend social deprivation index was used as a proxy of socioeconomic status. Smoking was categorized as never, previous or current.

### References:

1. Titova OE, Baron JA, Michaëlsson K, Larsson SC. Anger frequency and risk of cardiovascular morbidity and mortality. *Eur Heart J Open*. 2022 Aug 6;2(4):oeac050.
2. Harris H, Håkansson N, Olofsson C, Stackelberg O, Julin B, Åkesson A, Wolk A. The Swedish mammography cohort and the cohort of Swedish men: study design and characteristics of 2 population-based longitudinal cohorts. *OA Epidemiol* 2013;1:16.
3. Stackelberg O, Bjorck M, Larsson SC, Orsini N, Wolk A. Sex differences in the association between smoking and abdominal aortic aneurysm. *Br J Surg*. Sep 2014;101(10):1230-7. doi:10.1002/bjs.9526
4. Orsini N, Bellocco R, Bottai M, Hagstromer M, Sjoström M, Pagano M, et al. Validity of self-reported total physical activity questionnaire among older women. *Eur J Epidemiol*. 2008;23(10):661-7.
5. Textor J and Hardt J. DAGitty: A graphical tool for analyzing causal diagrams. *Epidemiology*. 2011; 22:745.
6. Sun BB, Chiou J, Traylor M, Benner C, Hsu Y-H, Richardson TG, et al. Plasma proteomic associations with genetics and health in the UK Biobank. *Nature* 2023; 622(7982):329-338.

## Supplementary Material

**Supplementary Table 1.** Proteins included in the CVD II, CVD III and Metabolism assay Olink panels in SIMPLER cohorts

| CVD II panel |                                                                   | CVD III panel |                                                      | Metabolism panel |                                                               |
|--------------|-------------------------------------------------------------------|---------------|------------------------------------------------------|------------------|---------------------------------------------------------------|
| Abbreviation | Name                                                              | Abbreviation  | Name                                                 | Abbreviation     | Name                                                          |
| ACE2         | Angiotensin-converting enzyme 2                                   | ALCAM         | CD166 antigen                                        | AHCY             | Adenosylhomocysteinase                                        |
| ADAM-TS13    | A disintegrin and metalloproteinase with thrombospondin motifs 13 | AP-N          | Aminopeptidase N                                     | ADGRE2           | Adhesion G protein-coupled receptor E2                        |
| ADM          | Adrenomedullin                                                    | AXL           | Tyrosine-protein kinase receptor UFO                 | ADGRG2           | Adhesion G-protein coupled receptor G2                        |
| AGRP         | Agouti-related protein                                            | AZU1          | Azurocidin                                           | APLP1            | Amyloid-like protein 1                                        |
| AMBP         | Protein AMBP                                                      | BLM hydrolase | Bleomycin hydrolase                                  | ANGPT2           | Angiopoietin-2                                                |
| ANGPT1       | Angiopoietin-1                                                    | CASP-3        | Caspase-3                                            | ANGPTL1          | Angiopoietin-related protein 1                                |
| BMP-6        | Bone morphogenetic protein 6                                      | CCL15         | C-C motif chemokine 15                               | ANGPTL7          | Angiopoietin-related protein 7                                |
| BNP          | Natriuretic peptides B                                            | CCL16         | C-C motif chemokine 16                               | ANXA11           | Annexin A11                                                   |
| CA5A         | Carbonic anhydrase 5A, mitochondrial                              | CCL22         | C-C motif chemokine 22                               | ANXA4            | Annexin A4                                                    |
| CCL17        | C-C motif chemokine 17                                            | CCL24         | C-C motif chemokine 24                               | GHRL             | Appetite-regulating hormone                                   |
| CCL3         | C-C motif chemokine 3                                             | CD163         | Scavenger receptor cysteine-rich type 1 protein M130 | ARG1             | Arginase-1                                                    |
| CD4          | T-cell surface glycoprotein CD4                                   | CD93          | Complement component C1q receptor                    | DDC              | Aromatic-L-amino-acid decarboxylase                           |
| CD40-L       | CD40 ligand                                                       | CDH5          | Cadherin-5                                           | CD79B            | B-cell antigen receptor complex-associated protein beta chain |
| CD84         | SLAM family member 5                                              | CHI3L1        | Chitinase-3-like protein 1                           | CDH2             | Cadherin-2                                                    |

## Supplementary Material

|         |                                                           |        |                                                     |        |                                           |
|---------|-----------------------------------------------------------|--------|-----------------------------------------------------|--------|-------------------------------------------|
| CEACAM8 | Carcinoembryonic antigen-related cell adhesion molecule 8 | CHIT1  | Chitotriosidase-1                                   | CDHR5  | Cadherin-related family member 5          |
| CTRC    | Chymotrypsin C                                            | CNTN1  | Contactin-1                                         | CLSTN2 | Calsyntenin-2                             |
| CTSL1   | Cathepsin L1                                              | COL1A1 | Collagen alpha-1(I) chain                           | CA13   | Carbonic anhydrase 13                     |
| CXCL1   | C-X-C motif chemokine 1                                   | CPA1   | Carboxypeptidase A1                                 | COMT   | Catechol O-methyltransferase              |
| DCN     | Decorin                                                   | CPB1   | Carboxypeptidase B                                  | CTSO   | Cathepsin O                               |
| DECR1   | 2,4-dienoyl-CoA reductase, mitochondrial                  | CSTB   | Cystatin-B                                          | CD2AP  | CD2-associated protein                    |
| Dkk-1   | Dickkopf-related protein 1                                | CTSD   | Cathepsin D                                         | CHRD2  | Chordin-like protein 2                    |
| FABP2   | Fatty acid-binding protein, intestinal                    | CTSZ   | Cathepsin Z                                         | CLUL1  | Clusterin-like protein 1                  |
| FGF21   | Fibroblast growth factor 21                               | CXCL16 | C-X-C motif chemokine 16                            | CCDC80 | Coiled-coil domain-containing protein 80  |
| FGF-23  | Fibroblast growth factor 23                               | DLK-1  | Protein delta homolog 1                             | CRKL   | Crk-like protein                          |
| FS      | Follistatin                                               | EGFR   | Epidermal growth factor receptor                    | CLEC5A | C-type lectin domain family 5 member A    |
| Gal-9   | Galectin-9                                                | Ep-CAM | Epithelial cell adhesion molecule                   | CLMP   | CXADR-like membrane protein               |
| GDF2    | Growth differentiation factor 2                           | EPHB4  | Ephrin type-B receptor 4                            | DIABLO | Diablo homolog, mitochondrial             |
| GH      | Growth hormone                                            | FABP4  | Fatty acid-binding protein, adipocyte               | QDPR   | Dihydropteridine reductase                |
| GIF     | Gastric intrinsic factor                                  | FAS    | Tumor necrosis factor receptor superfamily member 6 | DPP7   | Dipeptidyl peptidase 2                    |
| GLO1    | Lactoylglutathione lyase                                  | Gal-3  | Galectin-3                                          | DAB2   | Disabled homolog 2                        |
| GT      | Gastrotropin                                              | Gal-4  | Galectin-4                                          | APEX1  | DNA-(apurinic or apyrimidinic site) lyase |

## Supplementary Material

|                      |                                                           |         |                                              |         |                                                                  |
|----------------------|-----------------------------------------------------------|---------|----------------------------------------------|---------|------------------------------------------------------------------|
| HAOX1                | Hydroxyacid oxidase 1                                     | GDF15   | Growth differentiation factor 15             | ENTPD5  | Ectonucleoside triphosphate diphosphohydrolase 5                 |
| HB-EGF               | Proheparin-binding EGF-like growth factor                 | GRN     | Granulins                                    | ENPP7   | Ectonucleotide pyrophosphatase/phosphodiesterase family member 7 |
| HO-1                 | Heme oxygenase 1                                          | ICAM-2  | Intercellular adhesion molecule 2            | RNASE3  | Eosinophil cationic protein                                      |
| hOSCAR               | Osteoclast-associated immunoglobulin-like receptor        | IGFBP-1 | Insulin-like growth factor-binding protein 1 | FCRL1   | Fc receptor-like protein 1                                       |
| HSP 27               | Heat shock 27 kDa protein                                 | IGFBP-2 | Insulin-like Growth Factor-Binding Protein 2 | FBP1    | Fructose-1,6-bisphosphatase 1                                    |
| IDUA                 | Alpha-L-iduronidase                                       | IGFBP-7 | Insulin-like growth factor-binding protein 7 | GAL     | Galanin peptides                                                 |
| IgG Fc receptor II-b | Low affinity immunoglobulin gamma Fc region receptor II-b | IL-17RA | Interleukin-17 receptor A                    | ENO2    | Gamma-enolase                                                    |
| IL16                 | Pro-interleukin-16                                        | IL-18BP | Interleukin-18-binding protein               | GLRX    | Glutaredoxin-1                                                   |
| IL-17D               | Interleukin-17D                                           | IL-1RT1 | Interleukin-1 receptor type 1                | GRAP2   | GRB2-related adapter protein 2                                   |
| IL-18                | Interleukin-18                                            | IL-1RT2 | Interleukin-1 receptor type 2                | HDGF    | Hepatoma-derived growth factor                                   |
| IL-1ra               | Interleukin-1 receptor antagonist protein                 | IL2RA   | Interleukin-2 receptor subunit alpha         | ROR1    | Inactive tyrosine-protein kinase transmembrane receptor ROR1     |
| IL1RL2               | Interleukin-1 receptor-like 2                             | IL-6RA  | Interleukin-6 receptor subunit alpha         | IGFBPL1 | Insulin-like growth factor-binding protein-like 1                |
| IL-27                | Interleukin-27                                            | ITGB2   | Integrin beta-2                              | ITGB7   | Integrin beta-7                                                  |
| IL-4RA               | Interleukin-4 receptor subunit alpha                      | JAM-A   | Junctional adhesion molecule A               | KLK10   | Kallikrein-10                                                    |
| IL-6                 | Interleukin-6                                             | KLK6    | Kallikrein-6                                 | KYAT1   | Kynurenine--oxoglutarate transaminase 1                          |

## Supplementary Material

|                |                                          |                |                                                 |           |                                                                |
|----------------|------------------------------------------|----------------|-------------------------------------------------|-----------|----------------------------------------------------------------|
| ITGB1BP2       | Melusin                                  | LDL receptor   | Low-density lipoprotein receptor                | BAG6      | Large proline-rich protein BAG6                                |
| KIM-1          | Kidney injury molecule 1                 | LTBR           | Lymphotoxin-beta receptor                       | LRIG1     | Leucine-rich repeats and immunoglobulin-like domains protein 1 |
| LEP            | Leptin                                   | MB             | Myoglobin                                       | LILRA5    | Leukocyte immunoglobulin-like receptor subfamily A member 5    |
| LOX-1          | Lectin-like oxidized LDL receptor 1      | MCP-1          | Monocyte chemotactic protein 1                  | LRP11     | Low-density lipoprotein receptor-related protein 11            |
| LPL            | Lipoprotein lipase                       | MEPE           | Matrix extracellular phosphoglycoprotein        | ACP6      | Lysophosphatidic acid phosphatase type 6                       |
| MARCO          | Macrophage receptor MARCO                | MMP-2          | Matrix metalloproteinase-2                      | MEP1B     | Meprin A subunit beta                                          |
| MERTK          | Tyrosine-protein kinase Mer              | MMP-3          | Matrix metalloproteinase-3                      | METRNL    | Meteorin-like protein                                          |
| MMP-12         | Matrix metalloproteinase-12              | MMP-9          | Matrix metalloproteinase-9                      | MCFD2     | Multiple coagulation factor deficiency protein 2               |
| MMP-7          | Matrix metalloproteinase-7               | MPO            | Myeloperoxidase                                 | NADK      | NAD kinase                                                     |
| NEMO           | NF-kappa-B essential modulator           | Notch 3        | Neurogenic locus notch homolog protein 3        | NECTIN2   | Nectin-2                                                       |
| PAPPA          | Pappalysin-1                             | NT-pro BNP     | N-terminal prohormone brain natriuretic peptide | NPDC1     | Neural proliferation differentiation and control protein 1     |
| PAR-1          | Proteinase-activated receptor 1          | OPG            | Osteoprotegerin                                 | NPTXR     | Neuronal pentraxin receptor                                    |
| PARP-1         | Poly [ADP-ribose] polymerase 1           | OPN            | Osteopontin                                     | NOMO1     | Nodal modulator 1                                              |
| PDGF subunit B | Platelet-derived growth factor subunit B | PAI            | Plasminogen activator inhibitor 1               | NT-proBNP | N-terminal prohormone of brain natriuretic peptide             |
| PD-L2          | Programmed cell death 1 ligand 2         | PCSK9          | Proprotein convertase subtilisin/kexin type 9   | PILRB     | Paired immunoglobulin-like type 2 receptor beta                |
| PIgR           | Polymeric immunoglobulin receptor        | PDGF subunit A | Platelet-derived growth factor subunit A        | FKBP4     | Peptidyl-prolyl cis-trans isomerase FKBP4                      |



## Supplementary Material

|             |                                                  |         |                                                             |          |                                                                           |
|-------------|--------------------------------------------------|---------|-------------------------------------------------------------|----------|---------------------------------------------------------------------------|
| PGF         | Placenta growth factor                           | PECAM-1 | Platelet endothelial cell adhesion molecule                 | PAG1     | Phosphoprotein associated with glycosphingolipid- enriched microdomains 1 |
| PRELP       | Prolargin                                        | PGLYRP1 | Peptidoglycan recognition protein 1                         | CTSH     | Pro-cathepsin H                                                           |
| Protein BOC | Brother of CDO                                   | PI3     | Elafin                                                      | FAM3C    | Protein FAM3C                                                             |
| PRSS27      | Serine protease 27                               | PLC     | Perlecan                                                    | PPP1R2   | Protein phosphatase inhibitor 2                                           |
| PRSS8       | Prostasin                                        | PON3    | Paraoxonase (PON 3)                                         | S100P    | Protein S100-P                                                            |
| PSGL-1      | P-selectin glycoprotein ligand 1                 | PRTN3   | Myeloblastin                                                | REG4     | Regenerating islet-derived protein 4                                      |
| PTX3        | Pentraxin-related protein PTX3                   | PSPD    | Pulmonary surfactant-associated protein D                   | RTN4R    | Reticulon-4 receptor                                                      |
| RAGE        | Receptor for advanced glycosylation end products | RARRES2 | Retinoic acid receptor responder protein 2                  | ALDH1A1  | Retinal dehydrogenase 1                                                   |
| REN         | Renin                                            | RETN    | Resistin                                                    | NQO2     | Ribosyldihyronicotinamide dehydrogenase [quinone]                         |
| SCF         | Stem cell factor                                 | SCGB3A2 | Secretoglobin family 3A member 2                            | SSC4D    | Scavenger receptor cysteine-rich domain-containing group B protein        |
| SERPINA12   | Serpin A12                                       | SELE    | E-selectin                                                  | SOST     | Sclerostin                                                                |
| SLAMF7      | SLAM family member 7                             | SELP    | P-selectin                                                  | SEMA3F   | Semaphorin-3F                                                             |
| SOD2        | Superoxide dismutase [Mn], mitochondrial         | SHPS-1  | Tyrosine-protein phosphatase non- receptor type substrate 1 | SERPINB6 | Serpin B6                                                                 |
| SORT1       | Sortilin                                         | SPON1   | Spondin-1                                                   | SERPINB8 | Serpin B8                                                                 |
| SPON2       | Spondin-2                                        | ST2     | ST2 protein                                                 | SIGLEC7  | Sialic acid-binding Ig-like lectin 7                                      |

## Supplementary Material

|           |                                                       |           |                                                       |         |                                           |
|-----------|-------------------------------------------------------|-----------|-------------------------------------------------------|---------|-------------------------------------------|
| SRC       | Proto-oncogene tyrosine-protein kinase Src            | TFF3      | Trefoil factor 3                                      | CD164   | Sialomucin core protein 24                |
| STK4      | Serine/threonine-protein kinase 4                     | TFPI      | Tissue factor pathway inhibitor                       | CANT1   | Soluble calcium-activated nucleotidase 1  |
| TF        | Tissue factor                                         | TIMP4     | Metalloproteinase inhibitor 4                         | SUMF2   | Sulfatase-modifying factor 2              |
| TGM2      | Protein-glutamine gamma-glutamyltransferase 2         | TLT-2     | Trem-like transcript 2 protein                        | SNAP23  | Synaptosomal-associated protein 23        |
| THBS2     | Thrombospondin-2                                      | TNF-R1    | Tumor necrosis factor receptor 1                      | SDC4    | Syndecan-4                                |
| THPO      | Thrombopoietin                                        | TNF-R2    | Tumor necrosis factor receptor 2                      | CD1C    | T-cell surface glycoprotein CD1c          |
| TIE2      | Angiopoietin-1 receptor                               | TNFRSF10C | Tumor necrosis factor receptor superfamily member 10C | THOP1   | Thimet oligopeptidase                     |
| TM        | Thrombomodulin                                        | TNFRSF14  | Tumor necrosis factor receptor superfamily member 14  | TXNDC5  | Thioredoxin domain-containing protein 5   |
| TNFRSF10A | Tumor necrosis factor receptor superfamily member 10A | TNFSF13B  | Tumor necrosis factor ligand superfamily member 13B   | TYMP    | Thymidine phosphorylase                   |
| TNFRSF11A | Tumor necrosis factor receptor superfamily member 11A | t-PA      | Tissue-type plasminogen activator                     | TSHB    | Thyrotropin subunit beta                  |
| TNFRSF13B | Tumor necrosis factor receptor superfamily member 13B | TR        | Transferrin receptor protein 1                        | TFF2    | Trefoil factor 2                          |
| TRAIL-R2  | TNF-related apoptosis-inducing ligand receptor 2      | TR-AP     | Tartrate-resistant acid phosphatase type 5            | TINAGL1 | Tubulointerstitial nephritis antigen-like |
| VEGF-D    | Vascular endothelial growth factor D                  | uPA       | Urokinase-type plasminogen activator                  | TYRO3   | Tyrosine-protein kinase receptor TYRO3    |
| VSIG2     | V-set and immunoglobulin domain-containing protein 2  | U-PAR     | Urokinase plasminogen activator surface receptor      | USP8    | Ubiquitin carboxyl-terminal hydrolase 8   |
| XCL1      | Lymphotoxin                                           | vWF       | von Willebrand factor                                 | VCAN    | Versican core protein                     |

## Supplementary Material

**Supplementary Table 2.** Proteins in the CVD II, CVD III and Metabolism panels excluded from the analysis based on SIMPLER (more than 50% of samples were below LOD)

| Uppsala and Västmanland cohorts |               |                  |       |
|---------------------------------|---------------|------------------|-------|
| CVD II panel                    | CVD III panel | Metabolism panel |       |
| PAPPA                           | CCL22         | AHCY             | CTSH  |
| PARP-1                          |               | S100P            | NQO2  |
|                                 |               | GLRX             | DPP7  |
|                                 |               | DIABLO           | ARG1  |
|                                 |               | ANXA4            | USP8  |
|                                 |               | ANXA11           | FKBP4 |
|                                 |               | ITGB7            | DAB2  |

Abbreviations of proteins can be found in **Supplementary Table 1**.

## Supplementary Material

**Supplementary Table 3.** Details of the single nucleotide polymorphisms used as instrumental variables in the Mendelian randomization analysis

| Protein abbreviation                                                                                       | Alternative abbreviation | SNP         | Effect allele | Other allele | Beta   | SE    | P value   |
|------------------------------------------------------------------------------------------------------------|--------------------------|-------------|---------------|--------------|--------|-------|-----------|
| <b>Outcome data source – <i>Nikpay et al. 2015, CARDIoGRAMplusC4D Consortium, sample size =171,875</i></b> |                          |             |               |              |        |       |           |
| LILRA5                                                                                                     |                          | rs11084329  | C             | T            | -0.300 | 0.008 | 1.00E-200 |
| VSIG2                                                                                                      |                          | rs11219769  | T             | G            | 0.213  | 0.008 | 1.20E-142 |
| MMP-12                                                                                                     |                          | rs117563322 | T             | C            | -0.608 | 0.016 | 1.00E-200 |
| TR-AP                                                                                                      | ACP5                     | rs12983092  | T             | C            | 0.335  | 0.011 | 8.22E-197 |
| Gal-4                                                                                                      | LGALS4                   | rs140695578 | T             | A            | 0.280  | 0.019 | 3.68E-47  |
| CHI3L1                                                                                                     |                          | rs1538372   | G             | A            | 0.295  | 0.008 | 1.00E-200 |
| TFPI                                                                                                       |                          | rs17464221  | T             | C            | 0.308  | 0.008 | 1.00E-200 |
| U-PAR                                                                                                      | PLAUR                    | rs2302524   | C             | T            | -0.177 | 0.010 | 1.55E-74  |
| TR                                                                                                         | TFRC                     | rs2343851   | A             | T            | -0.407 | 0.012 | 1.00E-200 |
| TNFRSF14                                                                                                   |                          | rs2495366   | A             | G            | 0.115  | 0.007 | 3.86E-54  |
| FAM3C                                                                                                      |                          | rs2707502   | A             | T            | -0.114 | 0.008 | 4.78E-43  |
| TRAIL-R2                                                                                                   | TNFRSF10B                | rs2889      | G             | A            | 0.310  | 0.008 | 1.00E-200 |
| MMP-3                                                                                                      | MMP3                     | rs3020919   | T             | C            | 0.257  | 0.007 | 1.00E-200 |
| FS                                                                                                         | FST                      | rs31226     | C             | T            | -0.142 | 0.008 | 1.89E-77  |
| RARRES2                                                                                                    |                          | rs3735167   | T             | C            | 0.216  | 0.008 | 3.27E-144 |
| IGFBP-1                                                                                                    |                          | rs3828998   | C             | T            | -0.047 | 0.008 | 6.86E-10  |
| ADM                                                                                                        |                          | rs4267063   | T             | G            | 0.153  | 0.007 | 3.71E-103 |
| OPG                                                                                                        | TNFRSF11B                | rs4629902   | C             | A            | 0.080  | 0.007 | 6.17E-28  |
| KIM1                                                                                                       | HAVCR1                   | rs4704836   | A             | G            | 0.440  | 0.007 | 1.00E-200 |
| CTSZ                                                                                                       |                          | rs4764822   | T             | C            | -0.319 | 0.008 | 1.00E-200 |
| REN                                                                                                        |                          | rs4951315   | A             | C            | -0.076 | 0.008 | 2.08E-22  |
| OPN                                                                                                        | SPP1                     | rs56254643  | C             | T            | -0.114 | 0.009 | 7.26E-36  |
| CTSD                                                                                                       |                          | rs56385468  | G             | T            | -0.511 | 0.013 | 1.00E-200 |
| TNF-R2                                                                                                     | TNFRSF1B                 | rs5746026   | A             | G            | -0.392 | 0.019 | 1.17E-96  |

## Supplementary Material

|                                                                |           |             |   |   |        |       |           |
|----------------------------------------------------------------|-----------|-------------|---|---|--------|-------|-----------|
| SELP                                                           |           | rs6136      | G | T | -0.403 | 0.012 | 1.00E-200 |
| FGF-23                                                         |           | rs6489536   | C | G | 0.108  | 0.008 | 1.24E-43  |
| PGF                                                            |           | rs6574205   | C | G | -0.153 | 0.007 | 2.84E-114 |
| TNFRSF10A                                                      |           | rs67902577  | C | A | 0.353  | 0.008 | 1.00E-200 |
| CLEC5A                                                         |           | rs6962760   | C | T | 0.215  | 0.007 | 1.65E-193 |
| GDF15                                                          |           | rs71355881  | A | C | 0.368  | 0.010 | 1.00E-200 |
| CD1C                                                           |           | rs76291980  | T | C | -0.181 | 0.020 | 8.09E-20  |
| CXCL16                                                         |           | rs78086290  | T | A | 0.189  | 0.007 | 1.45E-148 |
| CCL15                                                          |           | rs79061680  | G | T | 0.090  | 0.016 | 2.78E-08  |
| PRSS8                                                          |           | rs889555    | T | C | 0.115  | 0.008 | 5.71E-49  |
| TIMP4                                                          |           | rs900138    | G | A | 0.322  | 0.008 | 1.00E-200 |
|                                                                |           |             |   |   |        |       |           |
| <b>Outcome data source – FinnGen R10, sample size =369,139</b> |           |             |   |   |        |       |           |
| LILRA5                                                         |           | rs11084329  | C | T | -0.300 | 0.008 | 1.00E-200 |
| VSIG2                                                          |           | rs11219769  | T | G | 0.213  | 0.008 | 1.20E-142 |
| MMP-12                                                         |           | rs117563322 | T | C | -0.608 | 0.016 | 1.00E-200 |
| TR-AP                                                          | ACP5      | rs12983092  | T | C | 0.335  | 0.011 | 8.22E-197 |
| Gal-4                                                          | LGALS4    | rs140695578 | T | A | 0.280  | 0.019 | 3.68E-47  |
| CHI3L1                                                         |           | rs1538372   | G | A | 0.295  | 0.008 | 1.00E-200 |
| TFPI                                                           |           | rs17464221  | T | C | 0.308  | 0.008 | 1.00E-200 |
| U-PAR                                                          | PLAUR     | rs2302524   | C | T | -0.177 | 0.010 | 1.55E-74  |
| TR                                                             | TFRC      | rs2343851   | A | T | -0.407 | 0.012 | 1.00E-200 |
| TNFRSF14                                                       |           | rs2495366   | A | G | 0.115  | 0.007 | 3.86E-54  |
| FAM3C                                                          |           | rs2707502   | A | T | -0.114 | 0.008 | 4.78E-43  |
| TRAIL-R2                                                       | TNFRSF10B | rs2889      | G | A | 0.310  | 0.008 | 1.00E-200 |
| MMP-3                                                          | MMP3      | rs3020919   | T | C | 0.257  | 0.007 | 1.00E-200 |
| FS                                                             | FST       | rs31226     | C | T | -0.142 | 0.008 | 1.89E-77  |
| RARRES2                                                        |           | rs3735167   | T | C | 0.216  | 0.008 | 3.27E-144 |
| IGFBP-1                                                        |           | rs3828998   | C | T | -0.047 | 0.008 | 6.86E-10  |

## Supplementary Material

|           |           |             |   |   |        |       |           |
|-----------|-----------|-------------|---|---|--------|-------|-----------|
| TNF-R1    | TNFRSF1A  | rs4149584   | T | C | -0.303 | 0.028 | 5.78E-27  |
| ADM       |           | rs4267063   | T | G | 0.153  | 0.007 | 3.71E-103 |
| OPG       | TNFRSF11B | rs4629902   | C | A | 0.080  | 0.007 | 6.17E-28  |
| KIM1      | HAVCR1    | rs4704836   | A | G | 0.440  | 0.007 | 1.00E-200 |
| CTSZ      |           | rs4764822   | T | C | -0.319 | 0.008 | 1.00E-200 |
| REN       |           | rs4951315   | A | C | -0.076 | 0.008 | 2.08E-22  |
| OPN       | SPP1      | rs56254643  | C | T | -0.114 | 0.009 | 7.26E-36  |
| CTSD      |           | rs56385468  | G | T | -0.511 | 0.013 | 1.00E-200 |
| Gal-9     | LGALS9    | rs571052714 | G | T | -0.250 | 0.024 | 9.34E-26  |
| TNF-R2    | TNFRSF1B  | rs5746026   | A | G | -0.392 | 0.019 | 1.17E-96  |
| SELP      |           | rs6136      | G | T | -0.403 | 0.012 | 1.00E-200 |
| FGF-23    |           | rs6489536   | C | G | 0.108  | 0.008 | 1.24E-43  |
| PGF       |           | rs6574205   | C | G | -0.153 | 0.007 | 2.84E-114 |
| TNFRSF10A |           | rs67902577  | C | A | 0.353  | 0.008 | 1.00E-200 |
| CLEC5A    |           | rs6962760   | C | T | 0.215  | 0.007 | 1.65E-193 |
| CD1C      |           | rs76291980  | T | C | -0.181 | 0.020 | 8.09E-20  |
| CXCL16    |           | rs78086290  | T | A | 0.189  | 0.007 | 1.45E-148 |
| CCL15     |           | rs79061680  | G | T | 0.090  | 0.016 | 2.78E-08  |
| REG4      |           | rs79795228  | A | C | 0.633  | 0.028 | 2.80E-115 |
| PRSS8     |           | rs889555    | T | C | 0.115  | 0.008 | 5.71E-49  |

*Abbreviations:* EA, effect allele; EAF, effect allele frequency; SE, standard error; SNP, single nucleotide polymorphism. Outcome data source – Nikpay et al. 2015, CARDIoGRAMplusC4D Consortium or FinnGen R10

## Supplementary Material

**Supplementary Table 4.** Baseline characteristics of SIMPLER participants by the incident myocardial infarction (MI) status during follow-up

| Characteristics*                                      | All            | Without MI     | Incident MI   |
|-------------------------------------------------------|----------------|----------------|---------------|
| <b>Number of participants</b>                         | 11,751         | 11,349         | 402           |
| <b>Age at baseline, years, means (SD)</b>             | 70.9 (6.8)     | 70.74 (6.7)    | 74.10 (7.0)   |
| <b>Women</b>                                          | 7,423 (63.2)   | 7,208 (63.5)   | 215 (53.5)    |
| <b>Education &gt; 12 years, n (%)</b>                 | 3,340 (29.1)   | 3,243 (29.3)   | 97 (24.4)     |
| <b>Current cigarette smoking, n (%)*</b>              | 3,457 (31.4)   | 3,289 (30.9)   | 168 (44.6)    |
| <b>Alcohol intake, g/day, median (Q1-Q3)</b>          | 5.0 (1.4-10.8) | 5.0 (1.5-10.8) | 3.7 (0.6-9.7) |
| <b>Walking/bicycling &gt;40 min/day, n (%)</b>        | 4,206 (38.4)   | 4,085 (38.6)   | 121 (33.5)    |
| <b>Exercise <math>\geq</math> 2 hours/week, n (%)</b> | 4,195 (38.4)   | 4,079 (38.6)   | 116 (32.6)    |
| <b>mDASH Diet Score, means (SD)</b>                   | 18.2 (3.7)     | 18.2 (3.7)     | 17.4 (3.7)    |
| <b>Systolic blood pressure, mmHg, means (SD)</b>      | 140.4 (17.8)   | 140.2 (17.8)   | 146.6 (18.2)  |
| <b>Fasting glucose, mmol/L, means (SD)</b>            | 5.8 (1.5)      | 5.7 (1.5)      | 6.0 (1.5)     |
| <b>LDL-C, mmol/L, means (SD)</b>                      | 3.3 (1.0)      | 3.3 (1.0)      | 3.4 (1.0)     |
| <b>HDL-C, mmol/L, means (SD)</b>                      | 1.5 (0.4)      | 1.6 (0.4)      | 1.4 (0.3)     |
| <b>Body mass index, kg/m<sup>2</sup>, means (SD)</b>  | 26.3 (4.1)     | 26.3 (4.1)     | 26.8 (4.0)    |

**Abbreviations:** mDASH, modified Dietary Approaches to Stop Hypertension; LDL-C, low-density lipoprotein cholesterol; HDL-C, high density lipoprotein cholesterol; Q1 - lower quartile, Q3 - upper quartile. \* Current smoking included smoking occasionally or regularly

## Supplementary Material

**Supplementary Table 5.** Baseline characteristics of the study participants in the replication cohort UK Biobank

| Characteristics                                      | All           | Women         | Men           |
|------------------------------------------------------|---------------|---------------|---------------|
| <b>Number of participants</b>                        | 51,613        | 28,313        | 23,300        |
| <b>Age at baseline, years, means (SD)</b>            | 57.2 (8.2)    | 57.1 (8.1)    | 57.3 (8.3)    |
| <b>Ethnic background, n (%)</b>                      |               |               |               |
| White                                                | 48,292 (93.7) | 26,530 (93.8) | 21,762 (93.5) |
| Black                                                | 1,341 (2.6)   | 748 (2.7)     | 593 (2.6)     |
| Asian                                                | 1,193 (2.3)   | 590 (2.1)     | 603 (2.6)     |
| Other                                                | 727 (1.4)     | 411 (1.5)     | 316 (1.4)     |
| <b>Townsend social deprivation index, mean (SD)</b>  | -1.20 (3.2)   | -1.2 (3.1)    | -1.2 (3.2)    |
| <b>Cigarette smoking, n (%)</b>                      |               |               |               |
| Never                                                | 28,404 (55.0) | 16,902 (59.7) | 11,502 (49.4) |
| Former                                               | 17,753 (34.4) | 8,869 (31.3)  | 8,884 (38.1)  |
| Current                                              | 5,396 (10.5)  | 2,508 (8.9)   | 2,888 (12.4)  |
| <b>Prevalent diabetes mellitus, n (%)*</b>           | 2,717 (5.3)   | 1,107 (3.9)   | 1,610 (6.9)   |
| <b>Systolic blood pressure, mmHg, means (SD)</b>     | 139.7 (19.7)  | 137.1 (20.3)  | 142.8 (18.5)  |
| <b>Body mass index, kg/m<sup>2</sup>, means (SD)</b> | 27.4 (4.8)    | 27.1 (5.2)    | 27.8 (4.2)    |
| <b>LDL-C, mmol/L, means (SD)</b>                     | 3.6 (0.9)     | 3.6 (0.9)     | 3.5 (0.9)     |
| <b>HDL-C, mmol/L, means (SD)</b>                     | 1.5 (0.4)     | 1.6 (0.4)     | 1.3 (0.3)     |
| <b>Incident MI during follow-up, n</b>               | 1355          | 477           | 878           |

Low-density lipoprotein cholesterol; HDL-C, high density lipoprotein cholesterol

\* Self-reported diabetes mellitus



## Supplementary Material

**Supplementary Table 6.** Associations between replicated proteins and incident myocardial infarction in the entire **SIMPLER cohort** in fully adjusted analyses, n=11,751

|    | <b>Protein abbreviation</b> | <b>HR</b> | <b>Min 95%</b> | <b>Max 95%</b> | <b>P-value</b> |
|----|-----------------------------|-----------|----------------|----------------|----------------|
| 1  | GDF15                       | 1.418     | 1.270          | 1.584          | 6.20E-10       |
| 2  | ADM                         | 1.332     | 1.164          | 1.524          | 3.10E-05       |
| 3  | KIM1                        | 1.284     | 1.160          | 1.422          | 1.30E-06       |
| 4  | TNFRSF11A                   | 1.256     | 1.122          | 1.407          | 7.70E-05       |
| 5  | PGF                         | 1.247     | 1.101          | 1.412          | 5.20E-04       |
| 6  | Gal-9                       | 1.238     | 1.086          | 1.410          | 1.30E-03       |
| 7  | METRNL                      | 1.237     | 1.093          | 1.399          | 7.30E-04       |
| 8  | AMBP                        | 1.230     | 1.082          | 1.399          | 1.60E-03       |
| 9  | TNFRSF10A                   | 1.229     | 1.097          | 1.376          | 3.60E-04       |
| 10 | OPG                         | 1.226     | 1.107          | 1.359          | 9.60E-05       |
| 11 | PRSS8                       | 1.225     | 1.066          | 1.408          | 4.30E-03       |
| 12 | CHI3L1                      | 1.220     | 1.102          | 1.350          | 1.20E-04       |
| 13 | IGFBP-1                     | 1.220     | 1.086          | 1.370          | 8.20E-04       |
| 14 | CTSL1                       | 1.215     | 1.080          | 1.367          | 1.20E-03       |
| 15 | VSIG2                       | 1.212     | 1.091          | 1.348          | 3.60E-04       |
| 16 | U-PAR                       | 1.212     | 1.103          | 1.332          | 6.80E-05       |
| 17 | RARRES2                     | 1.206     | 1.080          | 1.347          | 9.00E-04       |
| 18 | TNF-R1                      | 1.206     | 1.085          | 1.341          | 5.40E-04       |
| 19 | IL6                         | 1.203     | 1.097          | 1.318          | 8.20E-05       |
| 20 | TFPI                        | 1.203     | 1.076          | 1.344          | 1.10E-03       |
| 21 | FS                          | 1.197     | 1.077          | 1.330          | 8.80E-04       |
| 22 | Gal-4                       | 1.192     | 1.073          | 1.323          | 1.00E-03       |
| 23 | FGF-23                      | 1.191     | 1.090          | 1.302          | 1.20E-04       |
| 24 | MMP-3                       | 1.190     | 1.061          | 1.336          | 3.10E-03       |
| 25 | REN                         | 1.190     | 1.061          | 1.334          | 2.90E-03       |
| 26 | CTSZ                        | 1.188     | 1.063          | 1.328          | 2.40E-03       |

## Supplementary Material

|    |          |       |       |       |          |
|----|----------|-------|-------|-------|----------|
| 27 | CTSD     | 1.183 | 1.074 | 1.303 | 6.30E-04 |
| 28 | LILRA5   | 1.181 | 1.054 | 1.323 | 4.00E-03 |
| 29 | CLEC5A   | 1.179 | 1.066 | 1.303 | 1.30E-03 |
| 30 | TNFRSF14 | 1.177 | 1.063 | 1.303 | 1.70E-03 |
| 31 | FAM3C    | 1.175 | 1.053 | 1.312 | 4.10E-03 |
| 32 | NPDC1    | 1.174 | 1.058 | 1.302 | 2.40E-03 |
| 33 | OPN      | 1.173 | 1.060 | 1.298 | 1.90E-03 |
| 34 | CCL15    | 1.166 | 1.059 | 1.283 | 1.70E-03 |
| 35 | CXCL16   | 1.165 | 1.054 | 1.287 | 2.70E-03 |
| 36 | MMP-12   | 1.164 | 1.045 | 1.296 | 5.90E-03 |
| 37 | TR       | 1.162 | 1.054 | 1.281 | 2.60E-03 |
| 38 | REG4     | 1.159 | 1.051 | 1.279 | 3.20E-03 |
| 39 | SELP     | 1.156 | 1.050 | 1.272 | 3.20E-03 |
| 40 | TFF3     | 1.155 | 1.053 | 1.266 | 2.30E-03 |
| 41 | TNF-R2   | 1.150 | 1.043 | 1.267 | 5.00E-03 |
| 42 | TRAIL-R2 | 1.147 | 1.059 | 1.242 | 7.30E-04 |
| 43 | TIMP4    | 1.140 | 1.034 | 1.257 | 8.80E-03 |
| 44 | TR-AP    | 1.119 | 1.028 | 1.218 | 9.20E-03 |
| 45 | CD1C     | 0.813 | 0.736 | 0.897 | 4.30E-05 |

Hazard ratios (HR) with 95% confidence intervals (CI) are expressed per standard deviation unit change in protein measurements. The models were adjusted for age (as the time scale), sex, education attainment, project, baseline cigarette smoking, alcohol consumption, physical activity (walking/bicycling and exercise), adherence to the mDASH diet, body mass index, systolic blood pressure, and blood levels of fasting glucose, low-density lipoprotein cholesterol, and high-density lipoprotein cholesterol.

## Supplementary Material

**Supplementary Table 7.** Associations between replicated proteins and incident myocardial infarction in the **UK Biobank cohort** in fully adjusted analyses, n=51,613

|    | <b>Protein abbreviation</b> | <b>HR</b> | <b>Min 95%</b> | <b>Max 95%</b> | <b>P-value</b> |
|----|-----------------------------|-----------|----------------|----------------|----------------|
| 1  | GDF15                       | 1.780     | 1.620          | 1.960          | 0.000          |
| 2  | ADM                         | 2.240     | 1.810          | 2.760          | 6.71E-14       |
| 3  | KIM-1 (HAVCR1)              | 1.380     | 1.270          | 1.490          | 2.22E-15       |
| 4  | TNFRSF11A                   | 1.370     | 1.200          | 1.570          | 4.07E-06       |
| 5  | PGF                         | 2.050     | 1.730          | 2.430          | 2.22E-16       |
| 6  | Gal-9 (LGALS9)              | 1.880     | 1.590          | 2.220          | 1.20E-13       |
| 7  | METRNL                      | n/a       | -              | -              | -              |
| 8  | AMBP                        | 2.480     | 1.910          | 3.230          | 1.24E-11       |
| 9  | TNFRSF10A                   | 1.590     | 1.380          | 1.840          | 3.18E-10       |
| 10 | OPG (TNFRSF11B)             | 1.970     | 1.660          | 2.340          | 1.04E-14       |
| 11 | PRSS8                       | 1.510     | 1.330          | 1.720          | 5.61E-10       |
| 12 | CHI3L1                      | 1.260     | 1.190          | 1.350          | 5.04E-13       |
| 13 | IGFBP-1                     | 1.080     | 1.030          | 1.130          | 0.001167       |
| 14 | CTSL1 (CTSL)                | 1.540     | 1.240          | 1.910          | 0.000109       |
| 15 | VSIG2                       | 1.260     | 1.150          | 1.380          | 1.78E-06       |
| 16 | U-PAR (PLAUR)               | 2.250     | 1.880          | 2.690          | 0              |
| 17 | RARRES2                     | 1.350     | 1.210          | 1.500          | 6.43E-08       |
| 18 | TNF-R1 (TNFRSF1A)           | 1.840     | 1.560          | 2.180          | 7.61E-13       |
| 19 | IL6                         | 1.210     | 1.150          | 1.290          | 4.56E-11       |
| 20 | TFPI                        | 1.450     | 1.230          | 1.710          | 8.02E-06       |
| 21 | FS (FST)                    | 1.210     | 1.080          | 1.350          | 0.000835       |
| 22 | Gal-4 (LGALS4)              | 1.390     | 1.260          | 1.530          | 3.48E-11       |
| 23 | FGF-23                      | 1.210     | 1.100          | 1.320          | 3.71E-05       |
| 24 | MMP-3                       | 1.370     | 1.230          | 1.520          | 5.30E-09       |

## Supplementary Material

|    |                         |       |       |       |          |
|----|-------------------------|-------|-------|-------|----------|
| 25 | REN                     | 1.240 | 1.160 | 1.320 | 2.77E-10 |
| 26 | CTSZ                    | 1.490 | 1.260 | 1.770 | 4.12E-06 |
| 27 | CTSD                    | 1.300 | 1.150 | 1.470 | 3.34E-05 |
| 28 | LILRA5                  | 1.730 | 1.470 | 2.050 | 1.11E-10 |
| 29 | CLEC5A                  | 1.550 | 1.300 | 1.840 | 6.58E-07 |
| 30 | TNFRSF14                | 1.640 | 1.380 | 1.940 | 8.56E-09 |
| 31 | FAM3C                   | 1.650 | 1.380 | 1.960 | 2.38E-08 |
| 32 | NPDC1                   | 1.580 | 1.360 | 1.830 | 1.03E-09 |
| 33 | OPN (SPP1)              | 1.420 | 1.260 | 1.590 | 4.37E-09 |
| 34 | CCL15                   | 1.350 | 1.210 | 1.520 | 2.47E-07 |
| 35 | CXCL16                  | 2.100 | 1.680 | 2.620 | 5.48E-11 |
| 36 | MMP-12                  | 1.700 | 1.550 | 1.860 | 0        |
| 37 | TR (TFRC)               | 1.190 | 1.030 | 1.360 | 0.01749  |
| 38 | REG4                    | 1.400 | 1.260 | 1.550 | 3.30E-10 |
| 39 | SELP                    | 1.210 | 1.100 | 1.330 | 9.13E-05 |
| 40 | TFF3                    | 1.420 | 1.280 | 1.570 | 1.11E-11 |
| 41 | TNF-R2<br>(TNFRSF1B)    | 1.490 | 1.340 | 1.650 | 1.94E-13 |
| 42 | TRAIL-R2<br>(TNFRSF10B) | 1.340 | 1.240 | 1.440 | 5.55E-15 |
| 43 | TIMP4                   | 1.390 | 1.220 | 1.590 | 7.62E-07 |
| 44 | TR-AP (ACP5)            | 1.380 | 1.170 | 1.620 | 0.000138 |
| 45 | CD1C                    | 0.680 | 0.550 | 0.850 | 0.000458 |

Hazard ratios (HR) with 95% confidence intervals (CI) are expressed per standard deviation unit change in protein measurements. In UK Biobank, models were adjusted for age, ethnicity (White, Black, Asian, and other), Townsend social deprivation index, smoking (never, previous or current), prevalent diabetes (yes/No), systolic blood pressure, body mass index, low-density lipoprotein cholesterol, and high-density lipoprotein cholesterol, and fasting time.

METRNL was not available in the UK Biobank data and, therefore, was not replicated.

## Supplementary Material

**Supplementary Table 8.** Associations between circulating proteins and incident myocardial infarction in **women** in the SIMPLER cohort and the UK Biobank cohort

|                                | <b>Protein abbreviation</b> | <b>HR</b> | <b>Min 95%</b> | <b>Max 95%</b> | <b>P-value</b>  |
|--------------------------------|-----------------------------|-----------|----------------|----------------|-----------------|
| <b>SIMPLER (n = 7,423)</b>     |                             |           |                |                |                 |
| 1                              | GDF15                       | 1.679     | 1.444          | 1.952          | <b>1.60E-11</b> |
| 2                              | MMP-3                       | 1.301     | 1.123          | 1.509          | <b>4.80E-04</b> |
| 3                              | CXCL16                      | 1.301     | 1.127          | 1.501          | <b>3.10E-04</b> |
| 4                              | Gal-4                       | 1.298     | 1.118          | 1.507          | <b>6.00E-04</b> |
| 5                              | TNFRSF14                    | 1.295     | 1.120          | 1.498          | <b>5.00E-04</b> |
| 6                              | EPHB4                       | 1.289     | 1.083          | 1.534          | <b>4.30E-03</b> |
| 7                              | FGF-23                      | 1.269     | 1.122          | 1.435          | <b>1.40E-04</b> |
| 8                              | U-PAR                       | 1.249     | 1.114          | 1.400          | <b>1.40E-04</b> |
| 9                              | CCL15                       | 1.229     | 1.077          | 1.403          | <b>2.20E-03</b> |
| 10                             | REG4                        | 1.224     | 1.070          | 1.401          | <b>3.30E-03</b> |
| 11                             | IL-1RT1                     | 1.220     | 1.050          | 1.417          | <b>9.40E-03</b> |
| 12                             | MMP-2                       | 1.220     | 1.052          | 1.415          | <b>8.70E-03</b> |
| 13                             | IGFBP-7                     | 1.214     | 1.065          | 1.383          | <b>3.70E-03</b> |
| <b>UK Biobank (n = 28,313)</b> |                             |           |                |                |                 |
| 1                              | GDF15                       | 1.880     | 1.630          | 2.180          | <b>0.000</b>    |
| 2                              | MMP-3                       | 1.530     | 1.290          | 1.810          | <b>7.69E-07</b> |
| 3                              | CXCL16                      | 2.870     | 1.990          | 4.150          | <b>1.75E-08</b> |
| 4                              | Gal-4                       | 1.580     | 1.340          | 1.860          | <b>4.53E-08</b> |
| 5                              | TNFRSF14                    | 2.090     | 1.580          | 2.770          | <b>3.03E-07</b> |
| 6                              | EPHB4                       | 2.270     | 1.650          | 3.130          | <b>5.41E-07</b> |
| 7                              | FGF-23                      | 1.370     | 1.210          | 1.560          | <b>1.07E-06</b> |
| 8                              | U-PAR                       | 2.990     | 2.200          | 4.070          | <b>3.15E-12</b> |
| 9                              | CCL15                       | 1.610     | 1.330          | 1.940          | <b>7.65E-07</b> |
| 10                             | REG4                        | 1.500     | 1.250          | 1.790          | <b>8.68E-06</b> |
| 11                             | IL-1RT1                     | 1.730     | 1.160          | 2.580          | <b>0.007434</b> |
| 12                             | MMP-2                       | n/a       | -              | -              | -               |
| 13                             | IGFBP7                      | 1.810     | 1.390          | 2.360          | <b>1.25E-05</b> |

## Supplementary Material

Hazard ratios (HR) with 95% confidence intervals (CI) are expressed per standard deviation unit change in protein measurements. In SIMPLER, models were adjusted for age (as the time scale), education attainment, project, baseline cigarette smoking, alcohol consumption, physical activity (walking/bicycling and exercise), adherence to the mDASH diet, body mass index, systolic blood pressure, and blood levels of fasting glucose, low-density lipoprotein cholesterol, and high-density lipoprotein cholesterol. In UK Biobank, models were adjusted for age, ethnicity (White, Black, Asian, and other), Townsend social deprivation index, smoking (never, previous or current), prevalent diabetes (yes/No), systolic blood pressure, body mass index, low-density lipoprotein cholesterol, and high-density lipoprotein cholesterol, and fasting time.

MMP-2 was not available in the UK Biobank data and, therefore, was not replicated. P-values < 0.05 are highlighted in bold.

## Supplementary Material

**Supplementary Table 9.** Associations between circulating proteins and incident myocardial infarction in men in the SIMPLER cohort and the UK Biobank cohort

|                                | <b>Protein abbreviation</b> | <b>HR</b> | <b>Min 95%</b> | <b>Max 95%</b> | <b>P-value</b>  |
|--------------------------------|-----------------------------|-----------|----------------|----------------|-----------------|
| <b>SIMPLER (n = 4,328)</b>     |                             |           |                |                |                 |
| 1                              | GDF15                       | 1.230     | 1.042          | 1.452          | <b>1.50E-02</b> |
| 2                              | MMP-3                       | 1.064     | 0.888          | 1.276          | 5.00E-01        |
| 3                              | CXCL16                      | 1.068     | 0.927          | 1.230          | 3.60E-01        |
| 4                              | Gal-4                       | 1.124     | 0.969          | 1.304          | 1.20E-01        |
| 5                              | TNFRSF14                    | 1.133     | 0.981          | 1.309          | 9.00E-02        |
| 6                              | EPHB4                       | 1.091     | 0.951          | 1.251          | 2.20E-01        |
| 7                              | FGF-23                      | 1.132     | 0.992          | 1.293          | 6.60E-02        |
| 8                              | U-PAR                       | 1.144     | 0.984          | 1.329          | 7.90E-02        |
| 9                              | CCL15                       | 1.118     | 0.970          | 1.289          | 1.20E-01        |
| 10                             | REG4                        | 1.105     | 0.957          | 1.276          | 1.70E-01        |
| 11                             | IL-1RT1                     | 1.023     | 0.884          | 1.185          | 7.60E-01        |
| 12                             | MMP-2                       | 0.990     | 0.854          | 1.148          | 9.00E-01        |
| 13                             | IGFBP-7                     | 0.975     | 0.840          | 1.131          | 7.40E-01        |
| <b>UK Biobank (n = 23,300)</b> |                             |           |                |                |                 |
| 1                              | GDF15                       | 1.730     | 1.520          | 1.960          | <b>2.22E-16</b> |
| 2                              | MMP-3                       | 1.290     | 1.130          | 1.470          | <b>0.000209</b> |
| 3                              | CXCL16                      | 1.740     | 1.310          | 2.290          | <b>0.000106</b> |
| 4                              | Gal-4                       | 1.290     | 1.150          | 1.460          | <b>3.03E-05</b> |
| 5                              | TNFRSF14                    | 1.430     | 1.160          | 1.760          | <b>0.000854</b> |
| 6                              | EPHB4                       | 1.290     | 1.000          | 1.670          | 0.050529        |
| 7                              | FGF-23                      | 1.090     | 0.960          | 1.230          | 0.205838        |
| 8                              | U-PAR                       | 1.950     | 1.560          | 2.430          | <b>3.41E-09</b> |
| 9                              | CCL15                       | 1.220     | 1.050          | 1.410          | <b>0.007732</b> |
| 10                             | REG4                        | 1.340     | 1.170          | 1.520          | <b>1.12E-05</b> |
| 11                             | IL-1RT1                     | 1.190     | 0.890          | 1.590          | 0.231623        |
| 12                             | MMP-2                       | n/a       | -              | -              | -               |
| 13                             | IGFBP-7                     | 1.400     | 1.150          | 1.700          | <b>0.000611</b> |

## Supplementary Material

Hazard ratios (HR) with 95% confidence intervals (CI) are expressed per standard deviation unit change in protein measurements. In SIMPLER, models were adjusted for age (as the time scale), education attainment, project, baseline cigarette smoking, alcohol consumption, physical activity (walking/bicycling and exercise), adherence to the mDASH diet, body mass index, systolic blood pressure, and blood levels of fasting glucose, low-density lipoprotein cholesterol, and high-density lipoprotein cholesterol. In UK Biobank, models were adjusted for age, ethnicity (White, Black, Asian, and other), Townsend social deprivation index, smoking (never, previous or current), prevalent diabetes (yes/No), systolic blood pressure, body mass index, low-density lipoprotein cholesterol, and high-density lipoprotein cholesterol, and fasting time.

MMP-2 was not available in the UK Biobank data and, therefore, was not replicated. P-values < 0.05 are highlighted in bold.



## Supplementary Material

**Supplementary Table 10.** Results of Mendelian randomization analysis for identified protein-related SNPs and the risk of myocardial infarction

|    | <b>Protein Abbreviation</b> | <b>Source</b> | <b>Beta</b> | <b>SE</b> | <b>P-value</b> |
|----|-----------------------------|---------------|-------------|-----------|----------------|
| 1  | GDF15                       | Consortium    | -0.043      | 0.046     | 0.353          |
| 2  | ADM                         | Consortium    | -0.089      | 0.068     | 0.191          |
|    |                             | FinnGen       | 0.097       | 0.067     | 0.147          |
|    |                             | Combined      | 0.005       | 0.048     | 0.908          |
| 3  | KIM-1 (HAVCR1)              | Consortium    | -0.002      | 0.024     | 0.934          |
|    |                             | FinnGen       | 0.023       | 0.024     | 0.327          |
|    |                             | Combined      | 0.011       | 0.017     | 0.524          |
| 4  | TNFRSF11A*                  |               | -           | -         | -              |
| 5  | PGF                         | Consortium    | -0.180      | 0.068     | <b>0.008</b>   |
|    |                             | FinnGen       | -0.087      | 0.067     | 0.195          |
|    |                             | Combined      | -0.133      | 0.048     | <b>0.005</b>   |
| 6  | Gal-9 (LGALS9)              | FinnGen       | -0.064      | 0.158     | 0.688          |
| 7  | METRNL*                     |               | -           | -         | -              |
| 8  | AMBP*                       |               | -           | -         | -              |
| 9  | TNFRSF10A                   | Consortium    | 0.050       | 0.035     | 0.155          |
|    |                             | FinnGen       | -0.015      | 0.034     | 0.653          |
|    |                             | Combined      | 0.016       | 0.025     | 0.503          |
| 10 | OPG (TNFRSF11B)             | Consortium    | -0.033      | 0.133     | 0.807          |
|    |                             | FinnGen       | -0.211      | 0.133     | 0.113          |
|    |                             | Combined      | -0.122      | 0.094     | 0.196          |
| 11 | PRSS8                       | Consortium    | 0.012       | 0.100     | 0.908          |
|    |                             | FinnGen       | -0.074      | 0.095     | 0.436          |
|    |                             | Combined      | -0.033      | 0.069     | 0.627          |
| 12 | CHI3L1                      | Consortium    | -0.043      | 0.037     | 0.253          |
|    |                             | FinnGen       | -0.038      | 0.036     | 0.291          |
|    |                             | Combined      | -0.040      | 0.026     | 0.120          |
| 13 | IGFBP-1                     | Consortium    | 0.017       | 0.234     | 0.943          |
|    |                             | FinnGen       | -0.332      | 0.230     | 0.150          |

## Supplementary Material

|    |                   |            |        |       |              |
|----|-------------------|------------|--------|-------|--------------|
|    |                   | Combined   | -0.160 | 0.164 | 0.329        |
| 14 | CTSL1 (CTSL)*     |            | -      | -     | -            |
| 15 | VSIG2             | Consortium | -0.008 | 0.057 | 0.892        |
|    |                   | FinnGen    | -0.106 | 0.053 | <b>0.048</b> |
|    |                   | Combined   | -0.060 | 0.039 | 0.123        |
| 16 | U-PAR (PLAUR)     | Consortium | -0.044 | 0.083 | 0.600        |
|    |                   | FinnGen    | 0.068  | 0.092 | 0.460        |
|    |                   | Combined   | 0.007  | 0.062 | 0.915        |
| 17 | RARRES2           | Consortium | 0.029  | 0.054 | 0.597        |
|    |                   | FinnGen    | 0.121  | 0.053 | <b>0.023</b> |
|    |                   | Combined   | 0.076  | 0.038 | <b>0.045</b> |
| 18 | TNF-R1 (TNFRSF1A) | FinnGen    | -0.327 | 0.157 | <b>0.037</b> |
| 19 | IL6*              |            | -      | -     | -            |
| 20 | TFPI              | Consortium | -0.092 | 0.037 | <b>0.012</b> |
|    |                   | FinnGen    | -0.060 | 0.036 | 0.096        |
|    |                   | Combined   | -0.076 | 0.026 | <b>0.003</b> |
| 21 | FS (FST)          | Consortium | 0.115  | 0.075 | 0.129        |
|    |                   | FinnGen    | 0.262  | 0.073 | <b>0.000</b> |
|    |                   | Combined   | 0.190  | 0.053 | <b>0.000</b> |
| 22 | Gal-4 (LGALS4)    | Consortium | 0.156  | 0.148 | 0.293        |
|    |                   | FinnGen    | 0.115  | 0.119 | 0.336        |
|    |                   | Combined   | 0.131  | 0.093 | 0.159        |
| 23 | FGF-23            | Consortium | 0.008  | 0.100 | 0.940        |
|    |                   | FinnGen    | 0.042  | 0.099 | 0.670        |
|    |                   | Combined   | 0.025  | 0.070 | 0.723        |
| 24 | MMP-3             | Consortium | 0.078  | 0.050 | 0.117        |
|    |                   | FinnGen    | 0.038  | 0.043 | 0.387        |
|    |                   | Combined   | 0.055  | 0.033 | 0.093        |
| 25 | REN               | Consortium | 0.230  | 0.146 | 0.115        |
|    |                   | FinnGen    | 0.291  | 0.146 | <b>0.046</b> |

## Supplementary Material

|    |            |            |        |       |              |
|----|------------|------------|--------|-------|--------------|
|    |            | Combined   | 0.261  | 0.103 | <b>0.012</b> |
| 26 | CTSZ       | Consortium | 0.044  | 0.034 | 0.197        |
|    |            | FinnGen    | 0.012  | 0.036 | 0.727        |
|    |            | Combined   | 0.029  | 0.025 | 0.240        |
| 27 | CTSD       | Consortium | -0.028 | 0.039 | 0.486        |
|    |            | FinnGen    | -0.042 | 0.045 | 0.354        |
|    |            | Combined   | -0.034 | 0.030 | 0.256        |
| 28 | LILRA5     | Consortium | -0.073 | 0.040 | 0.065        |
|    |            | FinnGen    | -0.027 | 0.035 | 0.446        |
|    |            | Combined   | -0.047 | 0.026 | 0.074        |
| 29 | CLEC5A     | Consortium | 0.051  | 0.048 | 0.287        |
|    |            | FinnGen    | 0.022  | 0.048 | 0.651        |
|    |            | Combined   | 0.036  | 0.034 | 0.284        |
| 30 | TNFRSF14   | Consortium | 0.122  | 0.092 | 0.186        |
|    |            | FinnGen    | 0.095  | 0.089 | 0.288        |
|    |            | Combined   | 0.108  | 0.064 | 0.093        |
| 31 | FAM3C      | Consortium | -0.020 | 0.100 | 0.843        |
|    |            | FinnGen    | -0.207 | 0.104 | <b>0.047</b> |
|    |            | Combined   | -0.110 | 0.072 | 0.129        |
| 32 | NPDC1*     |            | -      | -     | -            |
| 33 | OPN (SPP1) | Consortium | -0.130 | 0.122 | 0.289        |
|    |            | FinnGen    | -0.058 | 0.115 | 0.612        |
|    |            | Combined   | -0.092 | 0.084 | 0.274        |
| 34 | CCL15      | Consortium | -0.010 | 0.460 | 0.983        |
|    |            | FinnGen    | 0.111  | 0.296 | 0.708        |
|    |            | Combined   | 0.075  | 0.249 | 0.762        |
| 35 | CXCL16     | Consortium | -0.041 | 0.059 | 0.490        |
|    |            | FinnGen    | -0.034 | 0.054 | 0.528        |
|    |            | Combined   | -0.037 | 0.040 | 0.351        |
| 36 | MMP-12     | Consortium | -0.042 | 0.043 | 0.327        |
|    |            | FinnGen    | 0.003  | 0.041 | 0.944        |

## Supplementary Material

|    |                         |            |        |       |              |
|----|-------------------------|------------|--------|-------|--------------|
|    |                         | Combined   | -0.018 | 0.029 | 0.532        |
| 37 | TR (TFRC)               | Consortium | 0.004  | 0.037 | 0.916        |
|    |                         | FinnGen    | -0.007 | 0.041 | 0.861        |
|    |                         | Combined   | -0.001 | 0.027 | 0.971        |
| 38 | REG4                    | FinnGen    | 0.017  | 0.055 | 0.755        |
| 39 | SELP                    | Consortium | 0.074  | 0.053 | 0.163        |
|    |                         | FinnGen    | -0.069 | 0.039 | 0.076        |
|    |                         | Combined   | -0.019 | 0.031 | 0.544        |
| 40 | TFF3*                   |            | -      | -     | -            |
| 41 | TNF-R2<br>(TNFRSF1B)    | Consortium | -0.061 | 0.084 | 0.469        |
|    |                         | FinnGen    | -0.225 | 0.088 | <b>0.010</b> |
|    |                         | Combined   | -0.139 | 0.061 | <b>0.021</b> |
| 42 | TRAIL-R2<br>(TNFRSF10B) | Consortium | 0.009  | 0.036 | 0.808        |
|    |                         | FinnGen    | 0.010  | 0.034 | 0.760        |
|    |                         | Combined   | 0.010  | 0.025 | 0.698        |
| 43 | TIMP4                   | Consortium | 0.033  | 0.038 | 0.386        |
| 44 | TR-AP (ACP5)            | Consortium | -0.004 | 0.053 | 0.934        |
|    |                         | FinnGen    | -0.001 | 0.054 | 0.992        |
|    |                         | Combined   | -0.002 | 0.038 | 0.947        |
| 45 | CD1C                    | Consortium | -0.100 | 0.183 | 0.586        |
|    |                         | FinnGen    | -0.202 | 0.154 | 0.191        |
|    |                         | Combined   | -0.160 | 0.118 | 0.177        |

SE, standard error. \*TNFRSF11A, METRNL, AMBP, CTSL1 (CTSL), IL6, NPDC1, and TFF3 were not available in the outcome source or had no suitable instrumental variable in protein-related GWAS data or proxy SNPs.

## Supplementary Material

**Supplementary Table 11.** Associations between 45 proteins identified in the primary analysis and overall mortality in SIMPLER in fully adjusted analyses (n = 12,314)

|    | <b>Protein abbreviation</b> | <b>HR</b> | <b>Min 95%</b> | <b>Max 95%</b> | <b>P-value*</b> |
|----|-----------------------------|-----------|----------------|----------------|-----------------|
| 1  | GDF15                       | 1.517     | 1.446          | 1.592          | 3.90E-65        |
| 2  | ADM                         | 1.349     | 1.274          | 1.428          | 1.10E-24        |
| 3  | KIM1                        | 1.332     | 1.273          | 1.392          | 4.80E-36        |
| 4  | TNFRSF10A                   | 1.326     | 1.264          | 1.391          | 5.60E-31        |
| 5  | U-PAR                       | 1.287     | 1.238          | 1.338          | 3.60E-37        |
| 6  | TNF-R1                      | 1.247     | 1.193          | 1.304          | 1.80E-22        |
| 7  | OPN                         | 1.245     | 1.195          | 1.298          | 1.30E-25        |
| 8  | IL6                         | 1.245     | 1.199          | 1.293          | 2.60E-30        |
| 9  | PGF                         | 1.235     | 1.174          | 1.299          | 3.90E-16        |
| 10 | OPG                         | 1.230     | 1.178          | 1.285          | 8.80E-21        |
| 11 | CHI3L1                      | 1.225     | 1.173          | 1.280          | 1.10E-19        |
| 12 | TFF3                        | 1.225     | 1.181          | 1.271          | 1.30E-27        |
| 13 | CTSL1                       | 1.225     | 1.167          | 1.286          | 2.60E-16        |
| 14 | TNFRSF11A                   | 1.225     | 1.171          | 1.282          | 1.10E-18        |
| 15 | MMP-12                      | 1.217     | 1.162          | 1.275          | 9.70E-17        |
| 16 | FGF-23                      | 1.215     | 1.173          | 1.258          | 9.70E-28        |
| 17 | TRAIL-R2                    | 1.212     | 1.171          | 1.254          | 1.60E-28        |
| 18 | IGFBP-1                     | 1.210     | 1.150          | 1.273          | 2.70E-13        |
| 19 | TNFRSF14                    | 1.206     | 1.156          | 1.259          | 5.50E-18        |
| 20 | TIMP4                       | 1.204     | 1.156          | 1.253          | 2.70E-19        |
| 21 | CCL15                       | 1.201     | 1.152          | 1.253          | 1.10E-17        |
| 22 | CLEC5A                      | 1.200     | 1.150          | 1.253          | 4.50E-17        |
| 23 | TNF-R2                      | 1.198     | 1.152          | 1.245          | 3.70E-20        |
| 24 | Gal-9                       | 1.193     | 1.128          | 1.261          | 5.30E-10        |
| 25 | NPDC1                       | 1.191     | 1.141          | 1.244          | 1.60E-15        |
| 26 | FS                          | 1.190     | 1.138          | 1.244          | 1.80E-14        |
| 27 | TR                          | 1.188     | 1.140          | 1.238          | 2.30E-16        |
| 28 | REG4                        | 1.187     | 1.139          | 1.237          | 5.00E-16        |
| 29 | Gal-4                       | 1.187     | 1.134          | 1.242          | 1.60E-13        |
| 30 | PRSS8                       | 1.186     | 1.117          | 1.258          | 2.20E-08        |
| 31 | VSIG2                       | 1.183     | 1.132          | 1.238          | 1.80E-13        |

## Supplementary Material

|    |         |       |       |       |          |
|----|---------|-------|-------|-------|----------|
| 32 | METRNL  | 1.181 | 1.122 | 1.243 | 1.90E-10 |
| 33 | LILRA5  | 1.175 | 1.119 | 1.235 | 1.10E-10 |
| 34 | AMBP    | 1.159 | 1.095 | 1.226 | 3.00E-07 |
| 35 | MMP-3   | 1.150 | 1.095 | 1.208 | 3.00E-08 |
| 36 | FAM3C   | 1.142 | 1.091 | 1.195 | 1.40E-08 |
| 37 | REN     | 1.140 | 1.086 | 1.197 | 1.40E-07 |
| 38 | RARRES2 | 1.131 | 1.080 | 1.185 | 2.20E-07 |
| 39 | CTSZ    | 1.129 | 1.077 | 1.184 | 6.10E-07 |
| 40 | TFPI    | 1.119 | 1.068 | 1.173 | 2.80E-06 |
| 41 | CXCL16  | 1.116 | 1.071 | 1.164 | 2.70E-07 |
| 42 | CTSD    | 1.110 | 1.064 | 1.158 | 1.40E-06 |
| 43 | SELP    | 1.104 | 1.059 | 1.150 | 3.10E-06 |
| 44 | TR-AP   | 1.065 | 1.023 | 1.108 | 2.00E-03 |
| 45 | CD1C    | 0.928 | 0.890 | 0.968 | 5.40E-04 |

Hazard ratios (HR) with 95% confidence intervals (CI) are expressed per standard deviation unit change in protein measurements. The models were adjusted for age (as the time scale), sex, education attainment, project, baseline cigarette smoking, alcohol consumption, physical activity (walking/bicycling and exercise), adherence to the mDASH diet, body mass index, systolic blood pressure, and blood levels of fasting glucose, low-density lipoprotein cholesterol, and high-density lipoprotein cholesterol.

P-values are <0.05, all passed FDR.

## Supplementary Material

**Supplementary Table 12.** Druggability of proteins associated with MI in Mendelian randomization analysis

| <b>Protein Abbreviation</b><br>(alternative abbreviation) and <b>Drugbank ID*</b>                                                                                                                                                                                                                                                             | <b>UniProt ID</b> | <b>Drug or component name*</b>            | <b>Indication or biological function*</b>                                            | <b>Drug group*</b>               | <b>Detailed information (reference)*</b> |
|-----------------------------------------------------------------------------------------------------------------------------------------------------------------------------------------------------------------------------------------------------------------------------------------------------------------------------------------------|-------------------|-------------------------------------------|--------------------------------------------------------------------------------------|----------------------------------|------------------------------------------|
| <b>REN</b>                                                                                                                                                                                                                                                                                                                                    | P00797            |                                           |                                                                                      |                                  |                                          |
| DB00212                                                                                                                                                                                                                                                                                                                                       |                   | Remikiren                                 | High specificity renin inhibitor                                                     | experimental                     | <a href="#">Details</a>                  |
| DB09026                                                                                                                                                                                                                                                                                                                                       |                   | Aliskiren                                 | Renin inhibitor used to manage hypertension                                          | Approved by FDA, investigational | <a href="#">Details</a>                  |
| DB01844                                                                                                                                                                                                                                                                                                                                       |                   | N,N-dimethylformamide                     | N/A                                                                                  | experimental                     | <a href="#">Details</a>                  |
| DB02296                                                                                                                                                                                                                                                                                                                                       |                   | Isoamyl alcohol                           | N/A                                                                                  | experimental                     | <a href="#">Details</a>                  |
| DB02803                                                                                                                                                                                                                                                                                                                                       |                   | 3-Phenyl-1,2-Propandiol                   | N/A                                                                                  | experimental                     | <a href="#">Details</a>                  |
| DB03395                                                                                                                                                                                                                                                                                                                                       |                   | Enalkiren                                 | N/A                                                                                  | experimental                     | <a href="#">Details</a>                  |
| Details about other experimental drugs and clinical candidates (total n=21) are available: <a href="https://go.drugbank.com/bio_entities/BE0000270">https://go.drugbank.com/bio_entities/BE0000270</a><br><a href="https://www.ebi.ac.uk/chembl/target_report_card/CHEMBL286/">https://www.ebi.ac.uk/chembl/target_report_card/CHEMBL286/</a> |                   |                                           |                                                                                      |                                  |                                          |
| <b>FS (FST)</b>                                                                                                                                                                                                                                                                                                                               | P19883            |                                           |                                                                                      |                                  |                                          |
| DB01666                                                                                                                                                                                                                                                                                                                                       |                   | D-Myo-Inositol-Hexasulphate               | N/A                                                                                  | experimental                     | <a href="#">Details</a>                  |
| <b>RARRES2</b>                                                                                                                                                                                                                                                                                                                                | Q99969            | N/A                                       |                                                                                      |                                  |                                          |
| <b>TFPI</b>                                                                                                                                                                                                                                                                                                                                   | P10646            |                                           |                                                                                      |                                  |                                          |
| DB00036                                                                                                                                                                                                                                                                                                                                       |                   | Coagulation factor VIIa Recombinant Human | A form of recombinant human coagulation Factor VII used to treat hemophilia A and B. | approved                         | <a href="#">Details</a>                  |

## Supplementary Material

|                          |        |                                                                                                                       |                                                                                                                                                                                                                                          |                           |                         |
|--------------------------|--------|-----------------------------------------------------------------------------------------------------------------------|------------------------------------------------------------------------------------------------------------------------------------------------------------------------------------------------------------------------------------------|---------------------------|-------------------------|
| DB14562                  |        | Andexanet alfa                                                                                                        | A recombinant human coagulation Factor Xa that promotes blood coagulation. It is indicated for patients treated with rivaroxaban and apixaban, when reversal of anticoagulation is needed                                                | approved, investigational | <a href="#">Details</a> |
| <b>TNF-R2 (TNFRSF1B)</b> | P20333 |                                                                                                                       |                                                                                                                                                                                                                                          |                           |                         |
| DB11626                  |        | Tasonermin                                                                                                            | Used as adjunct in combination to treat irresectable soft tissue sarcoma of the limb                                                                                                                                                     | approved                  | <a href="#">Details</a> |
| <b>PGF</b>               | P49763 |                                                                                                                       |                                                                                                                                                                                                                                          |                           |                         |
| DB08885                  |        | Aflibercept                                                                                                           | Used for the treatment of neovascular (Wet) age-related macular degeneration (AMD), macular edema following retinal vein occlusion (RVO), diabetic macular edema (DME), diabetic retinopathy (DR), and retinopathy of prematurity (ROP). | approved                  | <a href="#">Details</a> |
| <b>TNF-R1 (TNFRSF1A)</b> | P19438 |                                                                                                                       |                                                                                                                                                                                                                                          |                           |                         |
| DB03507                  |        | 6-[3-(4-Morpholinyl)Propyl]-2-(3-Nitrophenyl)-5-Thioxo-5,6,-Dihydro-7h-Thienol[2',3':4,5]Pyrrolo[1,2-C]Imidazol-7-One | N/A                                                                                                                                                                                                                                      | experimental              | <a href="#">Details</a> |
| DB11626                  |        | Tasonermin                                                                                                            | A tumor necrosis factor alpha used along with surgery to remove soft tissue sarcomas of the limbs.                                                                                                                                       | approved                  | <a href="#">Details</a> |
|                          |        | GSK-1995057                                                                                                           | Respiratory Tract Diseases                                                                                                                                                                                                               | Phase 1 #                 |                         |

\* Information obtained from the DrugBank

# Information on experimental drugs obtained from the ChEMBL



## Supplementary Material

**Supplementary Figure 1.** Flow chart and study design based on SIMPLER and UK Biobank cohorts and Mendelian randomization analysis.

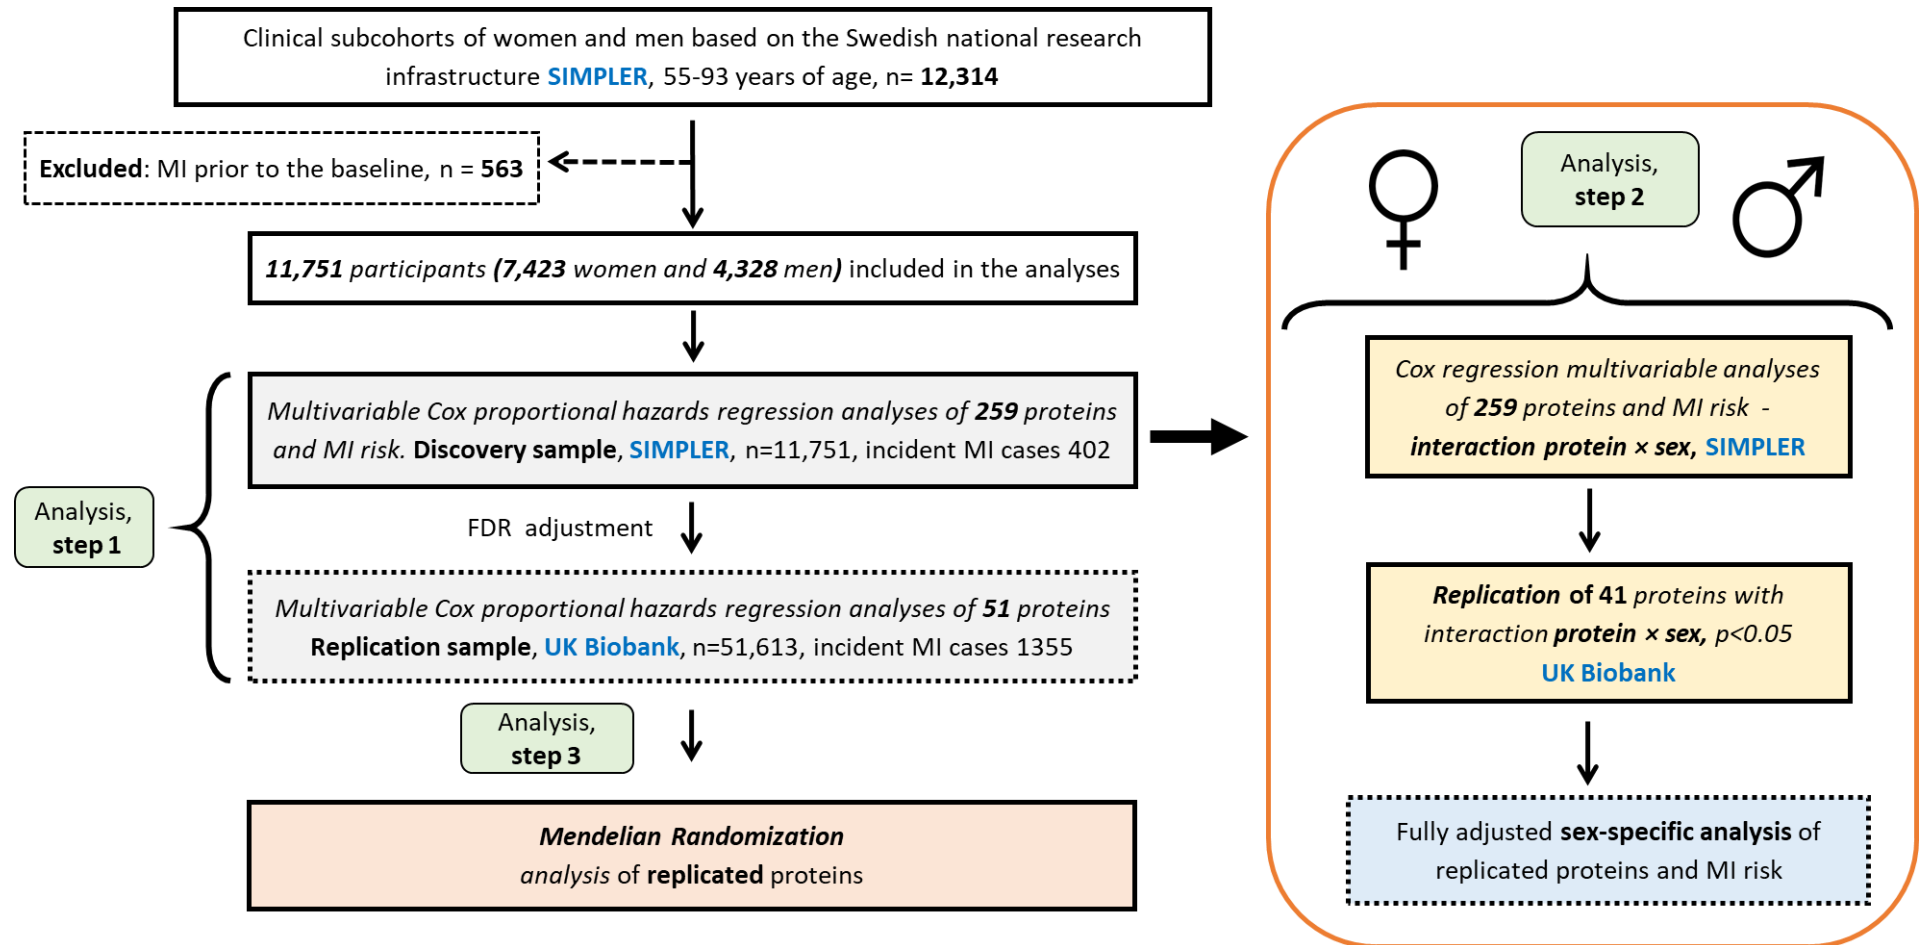

## Supplementary Material

**Supplementary Figure 2.** Correlation between 45 replicated circulating proteins associated with incident myocardial infarction in the analysis based on SIMPLER.

Heat map of Pearson's correlation coefficients. A color-coded label of correlation coefficients is shown on the right side of the heat map.

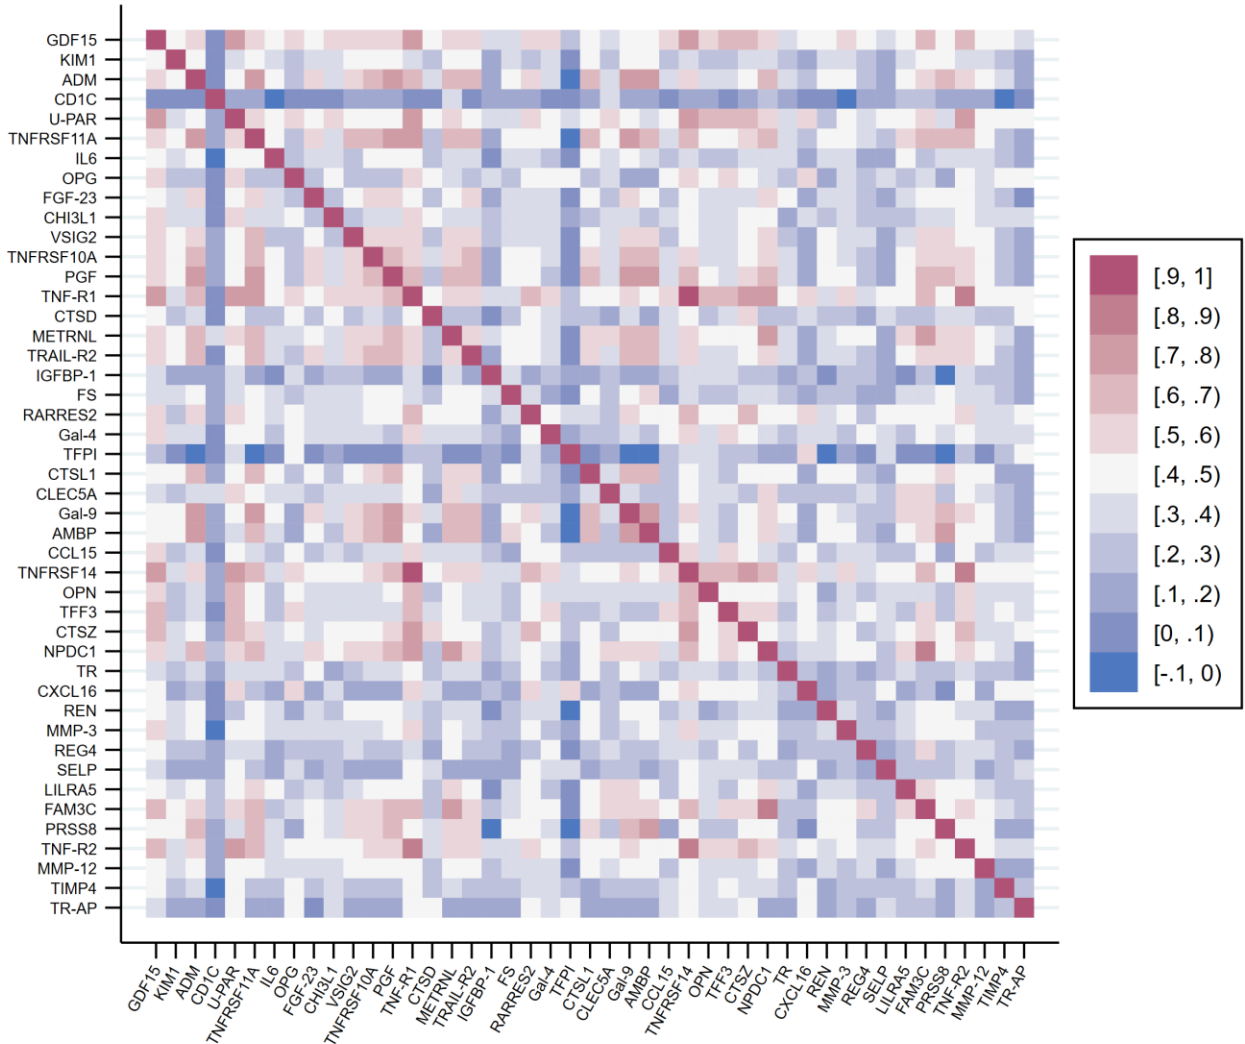

Supplement: ehae658_supplementary_data.pdf [file ehae658_supplementary_data.pdf]
